# Supplementary material
Source: MDPI journal article supplement (https://www.mdpi.com/2073-8994/15/11/2087)
Supplement: s1 [file s1]

**Supplementary Table S1.** Partial correlations between lower inter-limb asymmetries of body composition and specific performance outcomes in taekwondo athletes (n = 17).

| BC outcome | Specific Performance Outcome | Correlation-value | P-value | 95%CI Lower | 95%CI Upper |
|------------|------------------------------|-------------------|---------|-------------|-------------|
| BM (kg)    | set 1 (kicks)                | -0.67             | 0.01*   | -0.96       | -0.18       |
| BM (kg)    | set 2 (kicks)                | -0.76             | 0.00*   | -0.97       | -0.45       |
| BM (kg)    | set 3 (kicks)                | -0.62             | 0.01*   | -0.96       | -0.15       |
| BM (kg)    | set 4 (kicks)                | -0.62             | 0.02*   | -0.95       | -0.08       |
| BM (kg)    | set 5 (kicks)                | -0.57             | 0.03*   | -0.93       | -0.12       |
| BM (kg)    | total kicks                  | -0.68             | 0.01*   | -0.96       | -0.28       |
| BM (kg)    | KDI index (%)                | -0.12             | 0.35    | -0.79       | 0.67        |
| BM (kg)    | TSAT (S)                     | 0.45              | 0.92    | -0.20       | 0.92        |
| FM (kg)    | set 1 (kicks)                | -0.21             | 0.23    | -0.66       | 0.33        |
| FM (kg)    | set 2 (kicks)                | -0.09             | 0.37    | -0.59       | 0.47        |
| FM (kg)    | set 3 (kicks)                | -0.35             | 0.11    | -0.74       | 0.23        |
| FM (kg)    | set 4 (kicks)                | -0.21             | 0.24    | -0.67       | 0.40        |
| FM (kg)    | set 5 (kicks)                | -0.34             | 0.12    | -0.73       | 0.28        |
| FM (kg)    | total kicks                  | -0.26             | 0.19    | -0.69       | 0.32        |
| FM (kg)    | KDI index (%)                | 0.19              | 0.73    | -0.64       | 0.81        |
| FM (kg)    | TSAT (S)                     | 0.29              | 0.83    | -0.52       | 0.72        |
| %FM        | set 1 (kicks)                | 0.32              | 0.86    | -0.21       | 0.80        |
| %FM        | set 2 (kicks)                | 0.27              | 0.81    | -0.32       | 0.79        |
| %FM        | set 3 (kicks)                | 0.02              | 0.52    | -0.60       | 0.75        |
| %FM        | set 4 (kicks)                | 0.17              | 0.71    | -0.50       | 0.75        |
| %FM        | set 5 (kicks)                | -0.08             | 0.38    | -0.74       | 0.62        |
| %FM        | total kicks                  | 0.01              | 0.51    | -0.73       | 0.73        |
| %FM        | KDI index (%)                | 0.45              | 0.94    | -0.20       | 0.90        |
| %FM        | TSAT (S)                     | -0.07             | 0.40    | -0.78       | 0.62        |
| FM (kg)    | set 1 (kicks)                | -0.21             | 0.23    | -0.66       | 0.33        |
| FM (kg)    | set 2 (kicks)                | -0.09             | 0.37    | -0.59       | 0.47        |
| FM (kg)    | set 3 (kicks)                | -0.35             | 0.11    | -0.74       | 0.23        |
| FM (kg)    | set 4 (kicks)                | -0.21             | 0.24    | -0.67       | 0.40        |
| FM (kg)    | set 5 (kicks)                | -0.34             | 0.12    | -0.73       | 0.28        |
| FM (kg)    | total kicks                  | -0.26             | 0.19    | -0.69       | 0.32        |
| FM (kg)    | KDI index (%)                | 0.19              | 0.73    | -0.64       | 0.81        |
| FM (kg)    | TSAT (S)                     | 0.29              | 0.83    | -0.52       | 0.72        |
| FFM (kg)   | set 1 (kicks)                | -0.42             | 0.07    | -0.81       | 0.29        |
| FFM (kg)   | set 2 (kicks)                | -0.54             | 0.02*   | -0.85       | -0.00       |
| FFM (kg)   | set 3 (kicks)                | -0.62             | 0.01*   | -0.91       | -0.14       |
| FFM (kg)   | set 4 (kicks)                | -0.62             | 0.01*   | -0.93       | -0.04       |
| FFM (kg)   | set 5 (kicks)                | -0.70             | 0.00*   | -0.94       | -0.30       |
| FFM (kg)   | total kicks                  | -0.60             | 0.01*   | -0.89       | -0.10       |
| FFM (kg)   | KDI index (%)                | 0.45              | 0.94    | -0.39       | 0.87        |
| FFM (kg)   | TSAT (S)                     | 0.56              | 0.97    | -0.00       | 0.89        |
| LSTM (kg)  | set 1 (kicks)                | -0.42             | 0.07    | -0.81       | 0.27        |

|             |               |       |       |       |       |
|-------------|---------------|-------|-------|-------|-------|
| LSTM (kg)   | set 2 (kicks) | −0.54 | 0.02* | −0.84 | −0.00 |
| LSTM (kg)   | set 3 (kicks) | −0.62 | 0.01* | −0.90 | −0.15 |
| LSTM (kg)   | set 4 (kicks) | −0.61 | 0.01* | −0.93 | −0.03 |
| LSTM (kg)   | set 5 (kicks) | −0.70 | 0.00* | −0.94 | −0.31 |
| LSTM (kg)   | total kicks   | −0.60 | 0.01* | −0.89 | −0.08 |
| LSTM (kg)   | KDI index (%) | 0.45  | 0.94  | −0.39 | 0.87  |
| LSTM (kg)   | TSAT (S)      | 0.55  | 0.97  | −0.01 | 0.89  |
| BMC (g)     | set 1 (kicks) | 0.08  | 0.60  | −0.47 | 0.68  |
| BMC (g)     | set 2 (kicks) | 0.06  | 0.57  | −0.53 | 0.722 |
| BMC (g)     | set 3 (kicks) | −0.15 | 0.31  | −0.68 | 0.57  |
| BMC (g)     | set 4 (kicks) | −0.18 | 0.26  | −0.72 | 0.51  |
| BMC (g)     | set 5 (kicks) | −0.30 | 0.15  | −0.79 | 0.41  |
| BMC (g)     | total kicks   | −0.18 | 0.27  | −0.66 | 0.53  |
| BMC (g)     | KDI index (%) | 0.54  | 0.97  | 0.03  | 0.88  |
| BMC (g)     | TSAT (S)      | 0.38  | 0.90  | −0.42 | 0.76  |
| BMD (g cm2) | set 1 (kicks) | −0.20 | 0.25  | −0.70 | 0.41  |
| BMD (g cm2) | set 2 (kicks) | −0.04 | 0.44  | −0.67 | 0.61  |
| BMD (g cm2) | set 3 (kicks) | −0.40 | 0.08  | −0.79 | 0.22  |
| BMD (g cm2) | set 4 (kicks) | −0.44 | 0.06* | −0.84 | 0.11  |
| BMD (g cm2) | set 5 (kicks) | −0.49 | 0.04* | −0.83 | 0.10  |
| BMD (g cm2) | total kicks   | −0.36 | 0.10  | −0.77 | 0.28  |
| BMD (g cm2) | KDI index (%) | 0.46  | 0.94  | −0.18 | 0.81  |
| BMD (g cm2) | TSAT (S)      | −0.20 | 0.25  | −0.70 | 0.41  |

The results are expressed as R-Pearson or Rho-Spearman value, p-value with 95% confidence interval. Partial correlations are conditioned by sex, years, and training time. \*:  $p < 0.05$ .
